# Supplementary material for: Three-dimensional imaging and analysis of the internal structure of SAPO-34 zeolite crystals
Source: RSC Adv. 2018 Oct 1;8(59):33631–6. doi: 10.1039/c8ra05918g (PMC9086581; doi:10.1039/c8ra05918g)
Supplement: RA-008-C8RA05918G-s001 [file RA-008-C8RA05918G-s001.pdf]

Supplementary Information

## Three-dimensional imaging and analysis of internal structure of SAPO-34 zeolite crystals

Xue Bai<sup>a</sup>, Bo Chen<sup>a,b,\*</sup>, Fei Yang<sup>a</sup>, Xianping Liu<sup>a</sup>, Daniel Silva-Nunes<sup>c</sup> and Ian Robinson<sup>a,b,c,\*</sup>

<sup>a</sup>School of Materials Science and Engineering, Tongji University, Shanghai 201804, China. E-mail: bo.chen@tongji.edu.cn

<sup>b</sup>London Centre for Nanotechnology, University College London, London WC1H0AH, U.K. E-mail: i.robinson@ucl.ac.uk

<sup>c</sup>Division of Condensed Matter Physics and Materials Science, Brookhaven National Laboratory, Upton NY 11973, USA

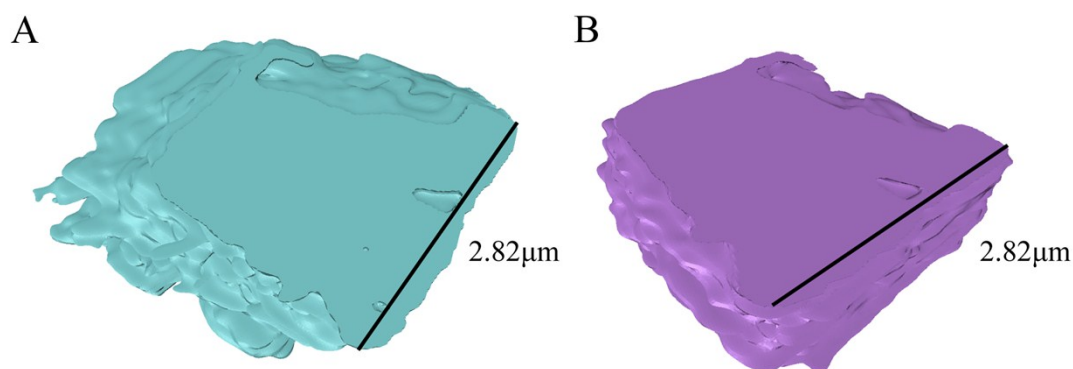

**Figure S1** 3D rendering of a single SAPO-34 particle. A: 3D images of the SAPO-34 particle before the alignment treatment of the slices. B: 3D images of the SAPO-34 particle after the alignment.

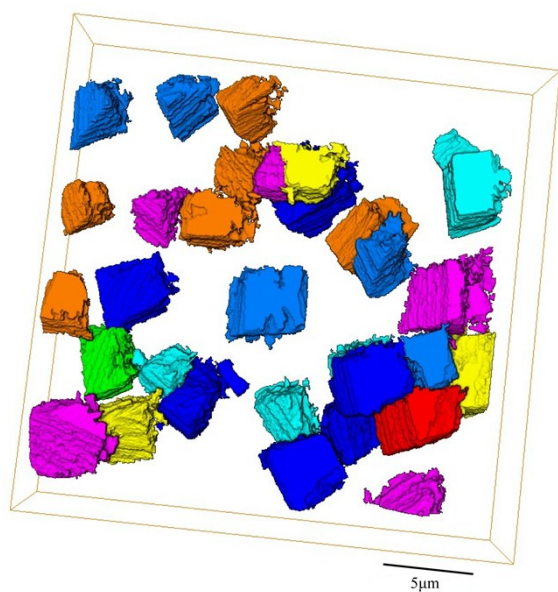

**Figure S2** Volume reconstruction obtained by automatic segmentation. (Colors are randomly assigned to each SAPO-34 particle by labeling module of Avizo software.)

A

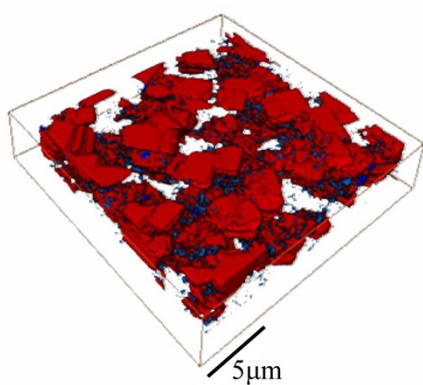

B

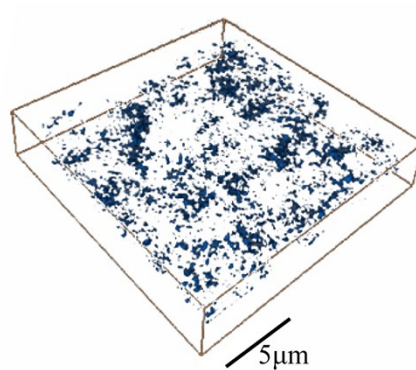

**Figure S3** Volume rendering of particles and small islands. A: particles (red) and small islands (blue) B: small islands alone

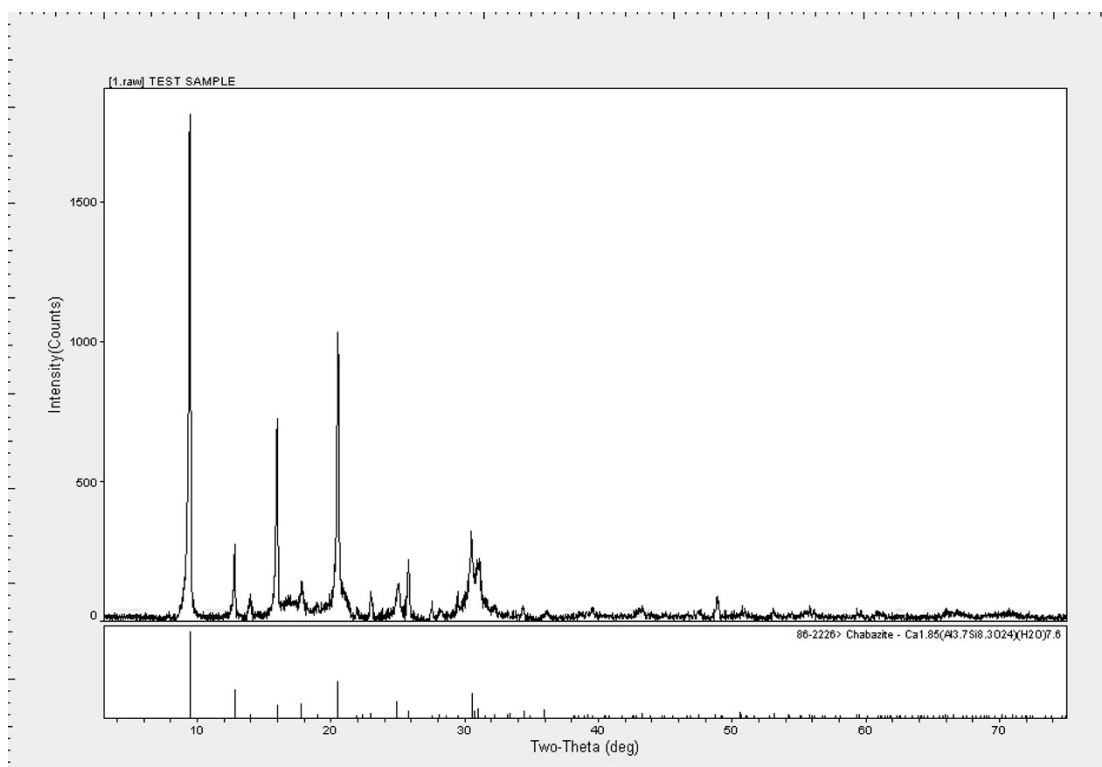

**Figure S4** Powder X-ray Diffraction (XRD) pattern of the SAPO-34 sample

**Table S1** Feret lengths of the observed 27 SAPO-34 obtained from Avizo software after segmentation

| Number | Length3D( $\mu\text{m}$ ) | Number | Length3D( $\mu\text{m}$ ) |
|--------|---------------------------|--------|---------------------------|
| 1      | 3.581                     | 15     | 2.522                     |
| 2      | 3.494                     | 16     | 2.516                     |
| 3      | 3.407                     | 17     | 2.443                     |
| 4      | 3.185                     | 18     | 2.419                     |
| 5      | 3.180                     | 19     | 2.364                     |
| 6      | 3.113                     | 20     | 2.294                     |
| 7      | 3.107                     | 21     | 2.244                     |
| 8      | 3.106                     | 22     | 2.244                     |
| 9      | 3.086                     | 23     | 2.189                     |
| 10     | 2.902                     | 24     | 2.164                     |
| 11     | 2.875                     | 25     | 2.140                     |
| 12     | 2.816                     | 26     | 2.032                     |
| 13     | 2.775                     | 27     | 1.734                     |
| 14     | 2.652                     | Mean   | 2.688                     |
